# Supplementary material for: Challenges in the Heterologous Production of Furanocoumarins in Escherichia coli
Source: MDPI journal article supplement (doi:10.3390/molecules27217230), 2022-10-25
Supplement: s1 [file s1]

## Supplementary material

Article

# Challenges in the heterologous production of furanocoumarins in *Escherichia coli*

Joana L Rodrigues <sup>1,2\*</sup>, Daniela Gomes <sup>1,2</sup> and Lígia R Rodrigues <sup>1,2</sup>

<sup>1</sup> CEB – Centre of Biological Engineering, University of Minho, 4710-057 Braga, Portugal; daniela.gomes@ceb.uminho.pt (DG); lrmr@deb.uminho.pt (LRR)

<sup>2</sup> LABBELS – Associate Laboratory, Braga/Guimarães, Portugal.

\* Correspondence: joanarodrigues@ceb.uminho.pt; joana.joanalucia@gmail.com (J.L.R.); Tel.: +351-253604423

**Table S1.** Gene sequence of *p*-coumaroyl-CoA 2'-hydroxylase (C2'H), prenyltransferase 1 (PT1) and psoralen synthase (PS) with codon optimization.

| Gene                               | Sequence                                                                                                                                                                                                                                                                                                                                                                                                                                                                                                                                                                                                                                                                                                                                                                                                                                                                                                                                                                                                                                                                                                                                                                                                                            |
|------------------------------------|-------------------------------------------------------------------------------------------------------------------------------------------------------------------------------------------------------------------------------------------------------------------------------------------------------------------------------------------------------------------------------------------------------------------------------------------------------------------------------------------------------------------------------------------------------------------------------------------------------------------------------------------------------------------------------------------------------------------------------------------------------------------------------------------------------------------------------------------------------------------------------------------------------------------------------------------------------------------------------------------------------------------------------------------------------------------------------------------------------------------------------------------------------------------------------------------------------------------------------------|
| C2'H<br>( <i>Ipomoea batatas</i> ) | <p>ATGCCGTCGACCACTCTGAGCACTGTTCTTAGTGATATTAATGACTTCGTCGTGAAAC<br/> AAGGCCACGGTGTTAAAGGCCTGTCCGAGCTGGGCTTACAAACCTTGCCGAACCAG<br/> TATGTGCATCCGCCAGAGGAGCGTTTAAAGCAGTATGGATGTGGTTTCCGATGACAGC<br/> ATCCCGGTGATCGATGTCAGCAATTGGGAAGACCCGAAAGTGGCCAAATTGATCTG<br/> CGACGCAGCCGAAAAGCGCGGTTTCTTTTCAGATTGTGAATCATGGCATTCCGATTGA<br/> AATGCTGGAGAAAGCAAAGGCCGCGACCTACCGTTTTTTTCGTGAACCAGCGGAGG<br/> AAAAGAAAAAGTACAGCAAGGAAAAGTGTCCAACCTCCACGTGCGCTACAGTACT<br/> AGTTTTCTTCCGCAGATTGAGAAGCGCTGGAGTGGAAGATCACCTGTCCATGTTT<br/> TATGTGTCCGATGAGGAAGCGGCCAGTACTGGCCGCCGTCGTGTCGCGATGATGCG<br/> GTTGAATACCTGAAATCGTGTGAAATGGTTAGTCGTAACTGTTAGAAGCACTTATG<br/> CAGGGTCTGAACGTTAATCAGATTGACGATTCCAAGGAGAGTCTGTTAATGGGCAGT<br/> CGTCGCATTAATATTAATATTATCCAAAATGCCCGAACCCAGATTGACCGTTGGT<br/> GTGGGTCGCCATAGCGATATCAGCACCTGACCCTGCTTTACAGGACGACATCGGC<br/> GGTTTATATGTTTCGTAAGCTGGAACATGAGGCCTGGTCCCATGTGCCGCCGGTGAAA<br/> GGTGCGTTAGTCATTAATATCGGCGATGCACTCCAGATTATGTCCAACGGTCGCTAT<br/> AAAAGTATTGAACACCGCGTGATGGCGAACGAAAGTAATGATCGTATCTCGGTTCC<br/> GGTGTGTTGTGAACCCGCGCCCGAATGATATTGTGGGCCCGCTGCCGGAGGTTTTGGC<br/> GTCGGGCGAAAAGCCAGTTTATAAACCAGTGCTGTATTCCGACTACGCAAAGCATT<br/> TTACCGTAAAGCGCATAACGGCAAAGATACGATCGCATTTCGCGCGCATTGAATAA</p> |
| PT1<br>( <i>Pastinaca sativa</i> ) | <p>ATGGCGCAGACCATTATGCACAGCCGCTTGAGCTCCGTTTCCTCCATCTGCAGCGTG<br/> ACAAGGGTTTTTCGCACCCTGCCAACTCAGCGTCGTCATGCCAAAGTTGTTAACGGCG<br/> ATCAAGAAATTCGCGTTTCGTGTGGTGAGCTGCGATAAAAAATTTAGACTCCACTAAAA<br/> ATTTTAGTGGCAGCTGTGAAAAACCGATTTCGCACCCATACTAATAAACTGCTGCAAA<br/> CCATCAGCGCAACCAGCGATCGTGAAGCCATCATCCAACCGAAGGATGATTATGAA<br/> GCCCCGTGGCAAAATACGCTGCGTCGTAAATGGGATGCGTTCTGTACGTTTGCCGT<br/> CCGATTTCGCGATTGTTGACGATTATCGGCATTAGCTCGGTGAGTCTGTTACCATTGA<br/> CTTCGGTTAAAGACTTCAGCGCACCATAATTTGTGCGCTTGCTGCAGGCCCTGATTCC<br/> ATTCCTGTGCGCCAATATTTACACCAGCGGCATCAATCAGCTGGTCGATGTGGACAT<br/> CGACAAAATTAATAAGCCATACCTGCCGTTGGTTTCGGGTGAGTTTAGTCTGGGTGA<br/> AGGCCGCGCCATTGTGTCGGCCCTTGCGTTTATGTGCCTTGCGGTGGGCATCCTTAGT<br/> CACAGCACGCCACTGTTTGTGGCGTGCTGGTTTACTTCCTGATCGGTACTGCATACA<br/> GTGTGGAACCTGCCGTTACTGCGTTGGAAAACTAAACCGGCGATGGCGGCGTTTAGCA<br/> TGGCAGGTTTGATGGGCCTGACGATTCAACCAGCAGTGTGTTTATCACATTCAAAACG<br/> CCCTGGGCAAACCGATGGTTTTTTTCCAAGACCGTCGCTTTGCAACGATTTTCTTCAG</p>                                                                                                                                                                                                                                          |

---

CGTGTTCGCGCGGTCCTTGGTGCAATTAAGATGTCCCGGACGTTGAGGGTGATAC  
 TGC GTTTGGTAACCGTACGTTTAGCGTGCGTTATGGTCAGGAGAAAGTTTTAGTGTT  
 TGTCTGAACATTCTCCTCTTAGCCTACGGCTTTGCAGTCGTGGTCGGCGCGAGTAGCA  
 GCTTCCTGTTATGCAAAATCGTGAGCGTTATGGGCCATACGACGTTAGCGTCGTTGTT  
 ACTTCTGCGCGCCAAAAGTACGAATCCAAAAGATCCGGAGAGCACCCAGAGTTTCT  
 ACATGTTTCTGTTCAAACCTTCTCTATGCAGAGTATGTC  
 CTGATCCACTTCATGCGTTAA

---

PS  
 (Ammi  
 majus)

ATGAAAATGCTTGAACAGAACCCGCAGTACCTGTACTTTTTTTCCTTGTTTCTGGTTA  
 CCATCTTTCTGTATAAATGGCTGACTCTCAAGAAAACCTCCGCTGAAAAATTTACCG  
 CCGAGCCCCGCCGAATACCCGATTATCGGTAATCTGCACCAGATTGGTCCGGACCC  
 GCAAGCATCCTTACGTGATTTGGCCAGAAAGTATGGTCCGCTGATGTTCTGAAATT  
 TGGCACGGTGCCGTTCTGGTTGTTTCGTCCGCGGACGCGGCACGCGAGGCGCTGA  
 AAACCCACGATCTGGTGTTTGC GGATCGTCCGTACAGTAGCGTTGCAAAATAAATT  
 TTTTATAACGGCAAAGATATGGTTTTTTCGCGCTATACGGAATACTGGCGTCAGGTT  
 AAGAGTATTTGCGTTACCCAGCTGTTGAGTAATAAACGCGTTAACAGCTTTCATTAT  
 GTGCGTGAGGAAGAAGTTGATCTCCTGGTGAGAATCTGGAGAATAGTCATAGCA  
 AAGTGGCGAACTTGACGGAATTACTGATTGAAAGTTACGGGCAATGTCGTGTGTCG  
 GTTAGTGTGGGCAGTGGCGATAAAGTCGATAGTTATAAAATTCTTATTCTGGAGAT  
 CATGGACATGCTGGGTTATAGCCGCAGCATCGAAGACTTTTTCCCATTACTGGGTTG  
 GGTGATTGGCTGACCGGTCTGCGCGGTAAGTGGCGGAAGCGGCGAAAGGTGTG  
 GATACGTTCTTGAGGGCGTTTTGAAGGAACACCTGAGCACGACCGGCTCCAAATA  
 CAATGATTTTCGTTAGCATTTTACTGGAAATTCAGGAAGCAGATGCGGGCAGCAGTA  
 TGGATAACGAGTGCAATTAAGAGCCTGATTTGGGACATGCTGGGCGCGGGTACGGA  
 AACCATTAGCACGGCGCTTGAATGGACGCTGGCCGCACTGATCAAGAATCCAGAC  
 GCGATGTTTAAACTCCAGAACGAAGTGC GCGAAATCGGCAAAGGCAAAAGCAAA  
 ATCAGCGAGGCGGACCTGGTGAAAATGAATTATCTGCAGGCGGTGATGAAGGAAA  
 GTATGCGCTTGATTTTACGGCGCCGCTTCTGGTGCCGCGCGAAGCGCGCCAGGAC  
 ATCAAATTTATGGGCTATGACATCAGCAGTGGCACCCAAGTCCTGATTAATGCGTG  
 GGCAATCGCCCGCGATCCGCTGCTGTGGGACAAACCGGAAGAATTCGCCCCGAA  
 CGTTTTTTGAATTCGCCGATCGACTACAAAGGTTTTCACTATGAATTCCTGCCATT  
 GGTGCAGGCCCGCGCGGTTGCCAGGCATTAGTTCGCAATGTGCATCAACGAACT  
 GGTGTTGCGAACCTGGTGCAAAATTCAATTTTGAGCTGCCAGATGGTAAACGTC  
 TGGAAGACCTGGATATGACCGCGGCGAGTGGCATTACTCTTCGCAAAAAATCCCCA  
 CTGCTCGTTGTGGCCCGTCCGCACGTGTAA

---

**Table S2.** Primers for PCR amplification of the genes of the biosynthetic pathway (forward (FW) and reverse (REV) primers) and sequencing.

| Primer name                       | Primer sequence <sup>1</sup>                                                                                | Restriction enzyme site |
|-----------------------------------|-------------------------------------------------------------------------------------------------------------|-------------------------|
| C2'H_pET_FW/ C2'H_pRSF_FW         | ACATGCCATGGAAATGCGCTCGACCACTCT                                                                              | NcoI                    |
| C2'H_pET_REV/ C2'H_pRSF_S-tag_REV | TTTTTCTCGAGTTCAATGCGCGCAATG                                                                                 | XhoI                    |
| C2'H_pRSF_REV/ C2'H_pRSF_His_REV  | AACCCAAGCTTTTATTCAATGCGCGCAAT                                                                               | HindIII                 |
| C2'H_pRSF_His_FW                  | AACGCGGATCCGATGCGCTCGACCACTCT                                                                               | BamHI                   |
| C2'H_pRSF_S-tag_FW                | AAAAAACATATGCGCTCGACCACTCT                                                                                  | NdeI                    |
| PcPT_pETDuet_FW                   | AAAAAACATATGAGCCAGACCTGAT                                                                                   | NdeI                    |
| PcPT_pETDuet_REV                  | AAAAACTCGAGTTAACGCATGAAGTG                                                                                  | XhoI                    |
| PcPT_pRSF/pCDF_FW                 | AAAAAGGATCCGATGAGCCAGA                                                                                      | BamHI                   |
| PcPT/Δ48PcPT_pRSF/pCDF/pET28_REV  | AAAAAAGCTTTTAAACGCATGAAGTG                                                                                  | HindIII                 |
| PcPT_pET28_FW                     | AAAAACCATGGAAATGAGCCAGACCTGAT                                                                               | NcoI                    |
| Δ48PcPT_pRSF/pCDF_FW              | AAAAAGGATCCGATGGCGTGCCACAAAAACGTTGATT                                                                       | BamHI                   |
| Δ48PcPT_pET28_FW                  | AAAAACCATGGAAATGGCGTGCCACAAAAACGTTGATT                                                                      | NcoI                    |
| PsPT_pET28_FW                     | AAAAACCATGGAAATGGCGCAGACCAT                                                                                 | NcoI                    |
| PsPT_pET28_REV                    | AAAAAAGCTTACGCATGAAGTGGATCA                                                                                 | HindIII                 |
| PsPT_pRSF_FW                      | AAAAAGGATCCAATGGCGCAGACCATTATG                                                                              | BamHI                   |
| PsPT_pRSF_REV                     | AAAAAAGCTTTTAAACGCATGAAGTGGATCA                                                                             | HindIII                 |
| Δ48PsPT1_FW                       | AAAAACATATGGCGTGCGATAAAAAATTTAGACTCCA                                                                       | NdeI                    |
| Δ48PsPT1_REV                      | AAAAACTCGAGACGCATGAAGTGGATCAGG                                                                              | XhoI                    |
| PS_pRSF_FW                        | AAAAAGGATCCAATGAAAATGCTTGAACAGAA                                                                            | BamHI                   |
| PS_pRSF_REV                       | AAAAAAGCTTTTACACGTGCGGACGG                                                                                  | HindIII                 |
| PS_pET_FW                         | AAAAACCATGGAAATGAAAATGCTTGAAC                                                                               | NcoI                    |
| PS_pET_REV                        | AAAAAAGCTTCACGTGCGGACGGG                                                                                    | HindIII                 |
| MA-Δ37PS_FW                       | AAAAACATATGGCGCCGCCGAGCCCCGCCG                                                                              | NdeI                    |
| MA/8RP/28tag/2C3-Δ37PS_REV        | AAAAACTCGAGCACGTGCGGACGGGCC                                                                                 | XhoI                    |
| 8RP-Δ37PS_FW                      | AAAAACATATGGCTCTGTTATTAGCAGTTTTTCCGCCGAGCCCCCG                                                              | NdeI                    |
| 28tag-Δ37PS_FW                    | AAAAACATATGGAATTATCACAAGTTTGTACAAAAAAGGAGGCTGGCGCCGGCACCAATTCAGTGGACTGGATTCAAGAAGGCGATATTACCCGCCGAGCCCCGCCG | NdeI                    |
| 2C3-Δ37PS_FW                      | AAAAACATATGGCTAAAAAAACCAGCAGCAAAGGTAAACCGCCGAGCCCCGCC                                                       | NdeI                    |
| GroES_FW                          | AAAAAGGATCCGATGAATATTCGTCCATTGCATGATCGC                                                                     | BamHI                   |
| GroEL_REV                         | AAAAAGTCGACTTACATCATGCCGCCCATGCG                                                                            | SalI                    |
| MS_FW                             | AAAAACATATGGATATTTTACCTCCTTAC                                                                               | NdeI                    |
| MS_REV                            | AAAAACTCGAGCTAATGCTTTGTGCGGCAC                                                                              | XhoI                    |
| 8RP-Δ25MS_FW                      | AAAAACATATGGCTCTGTTATTAGCAGTTTTTTTCTCTAAACACAAAAGGC                                                         | NdeI                    |
| Seq_MCS1_FW                       | GGATCTCGACGCTCTCCCTT                                                                                        | -                       |
| Seq_MCS2_FW                       | GTACACGGCCGCATAATCG                                                                                         | -                       |
| Seq_REV                           | CTAGTTATTGCTCAGCGGT                                                                                         | -                       |

<sup>1</sup> Start and stop codons in **bold**; restriction sites in *italic*; N-terminal modifications are underlined. In order for the sequence to remain in frame one or two bases were occasionally added between the restriction site and the gene start codon.

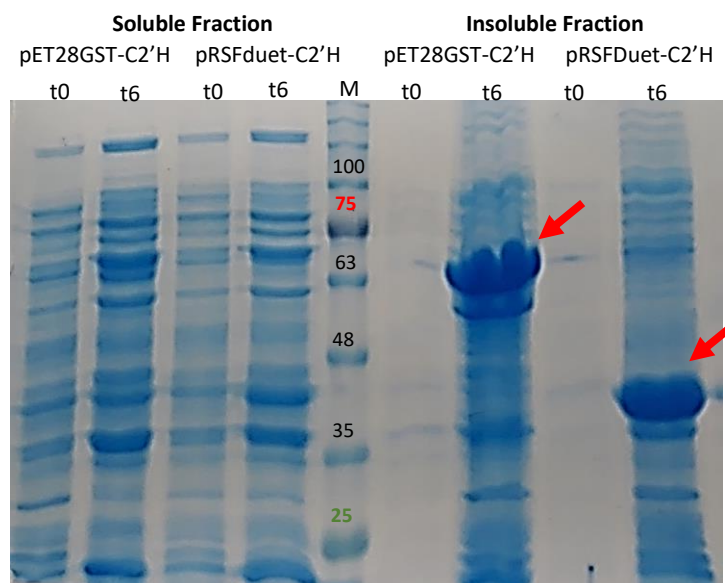

**Figure S1.** Protein SDS gels showing *p*-coumaroyl-CoA 2'-hydroxylase (C2'H) expression using different plasmids (pRSFDuet-C2'H and pET28GST-C2'H) at time zero (t0) of induction and after 6 h (t6) of induction. C2'H is expected around 40.41 kDa and GST+C2'H at 67.65 kDa. Arrows indicate where it is possible to observe the bands of interest. M: marker (NZYColour Protein Marker II – NZYTech).

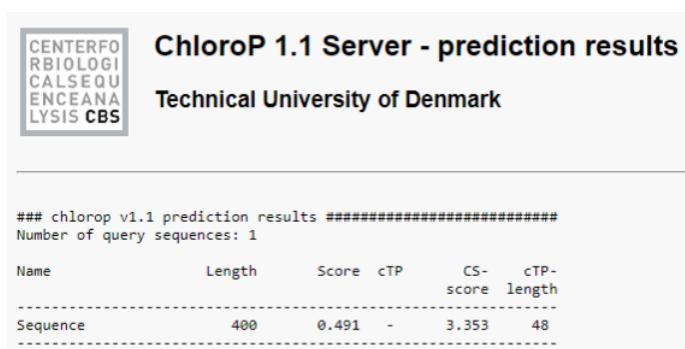

**Figure S2.** ChloroP results for PT from *Petroselinum crispum*.

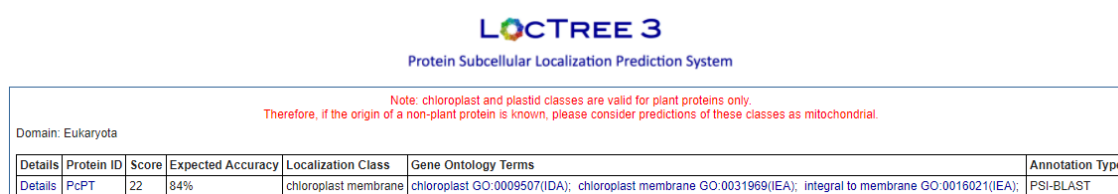

**Figure S3.** LocTree3 results for PT from *Petroselinum crispum*.

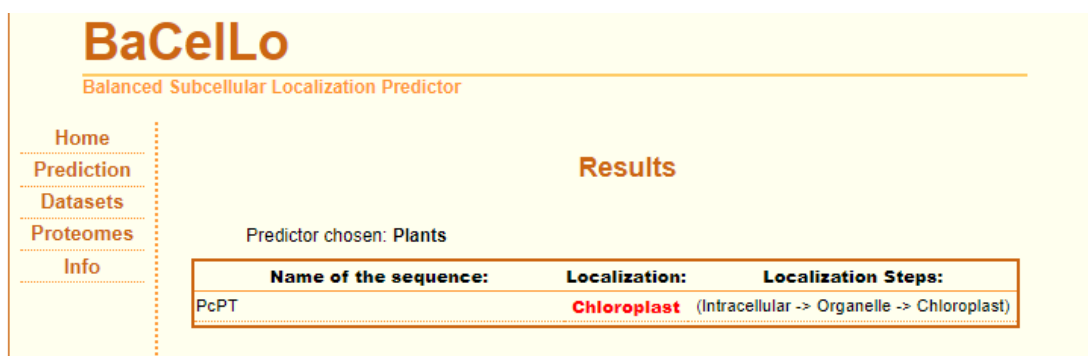

Figure S4. BaCellO results for PT from *Petroselinum crispum*.

### iPSORT Prediction

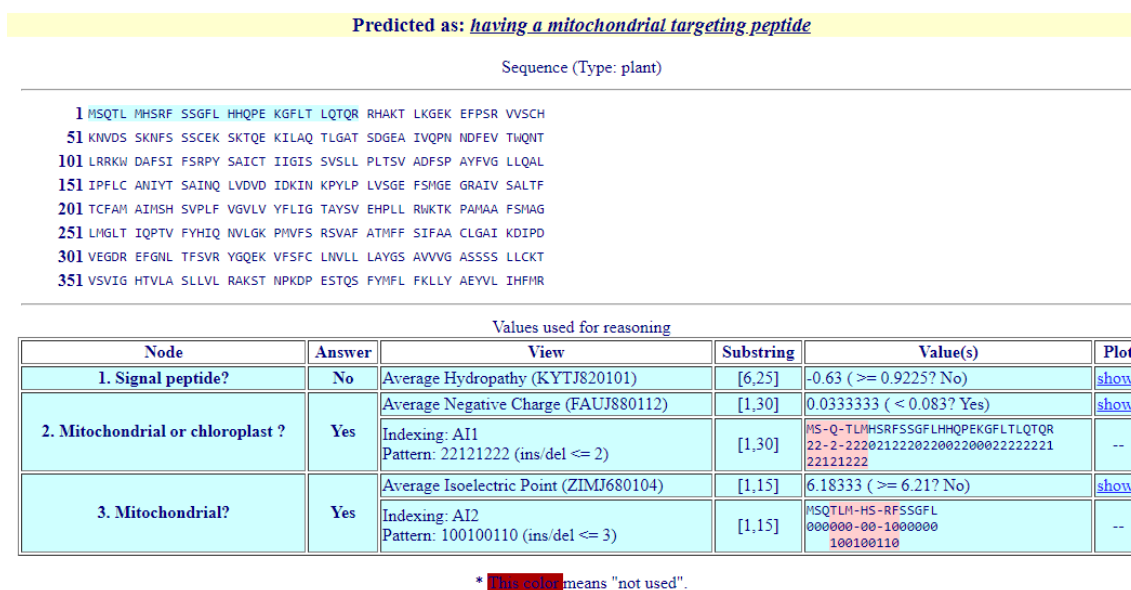

Figure S5. iPSORT results for PT from *Petroselinum crispum*.

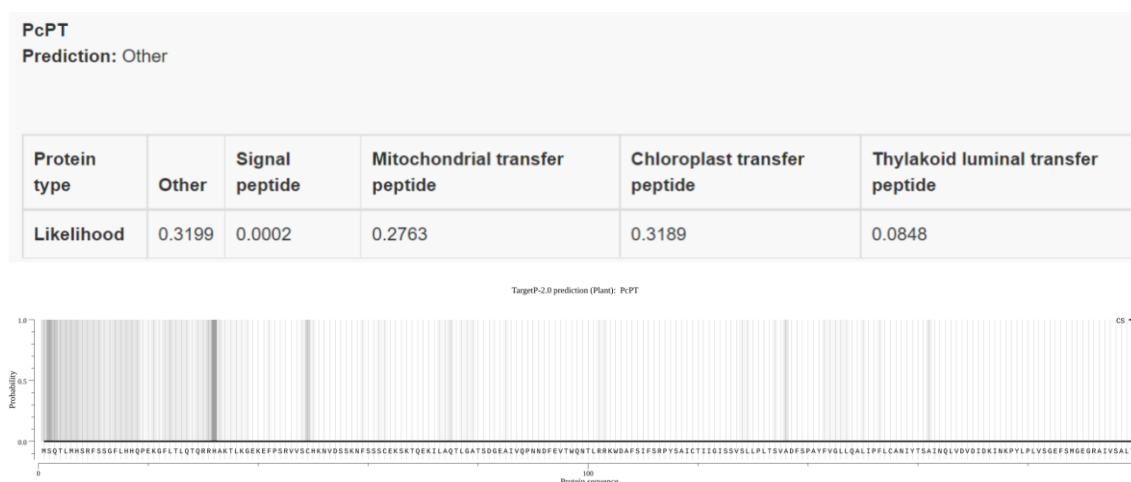

Figure S6. TargetP-2.0 results for PT from *Petroselinum crispum*.

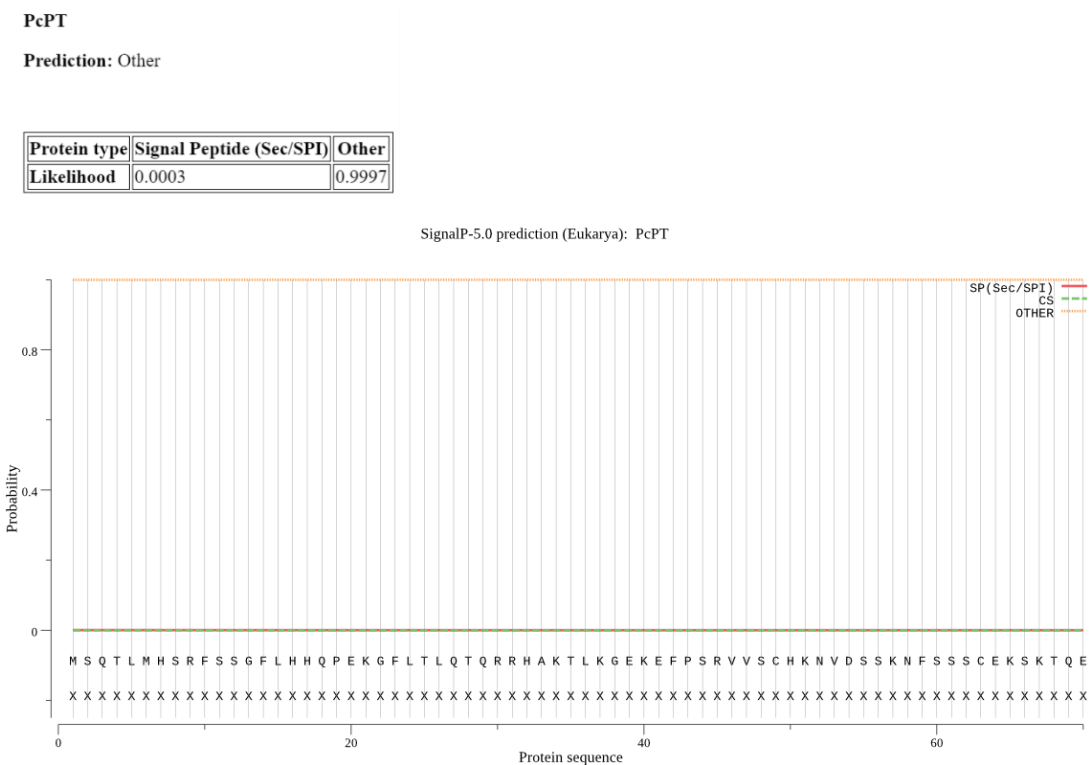

**Figure S7.** SignalP-5.0 results for PT from *Petroselinum crispum*.

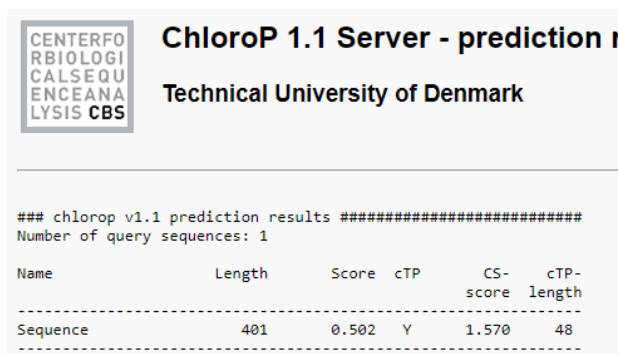

**Figure S8.** ChloroP results for PT1 from *Pastinaca sativa*.

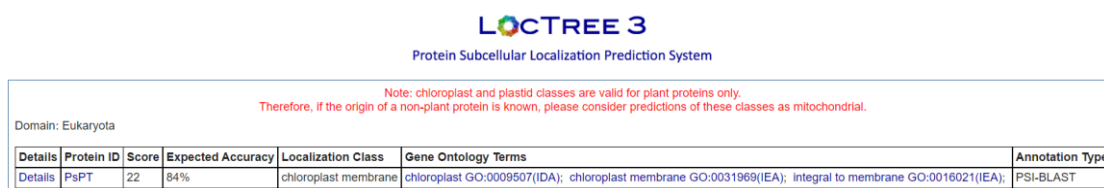

**Figure S9.** LocTree3 results for PT1 from *Pastinaca sativa*.

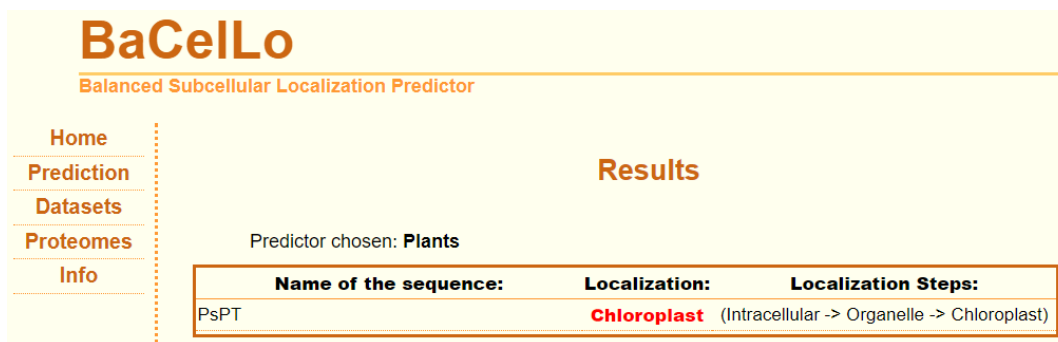

Figure S10. BaCelLo results for PT1 from *Pastinaca sativa*.

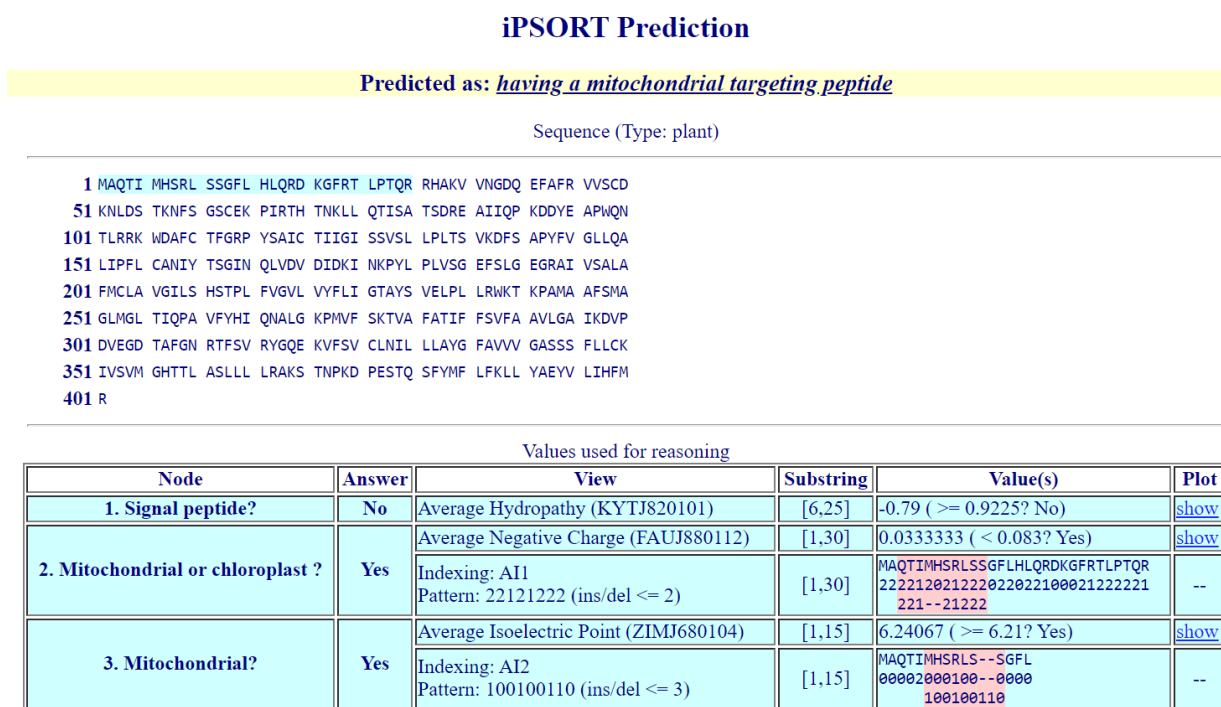

Figure S11. iPSORT results for PT1 from *Pastinaca sativa*.

**Sequence**

**Prediction:** Mitochondrial transfer peptide

CS pos: 32-33. RRH-AK. Pr: 0.7081

| Protein type | Other  | Signal peptide | Mitochondrial transfer peptide | Chloroplast transfer peptide | Thylakoid luminal transfer peptide |
|--------------|--------|----------------|--------------------------------|------------------------------|------------------------------------|
| Likelihood   | 0.3569 | 0.001          | 0.5376                         | 0.0989                       | 0.0056                             |

TargetP-2.0 prediction (Plant): Sequence

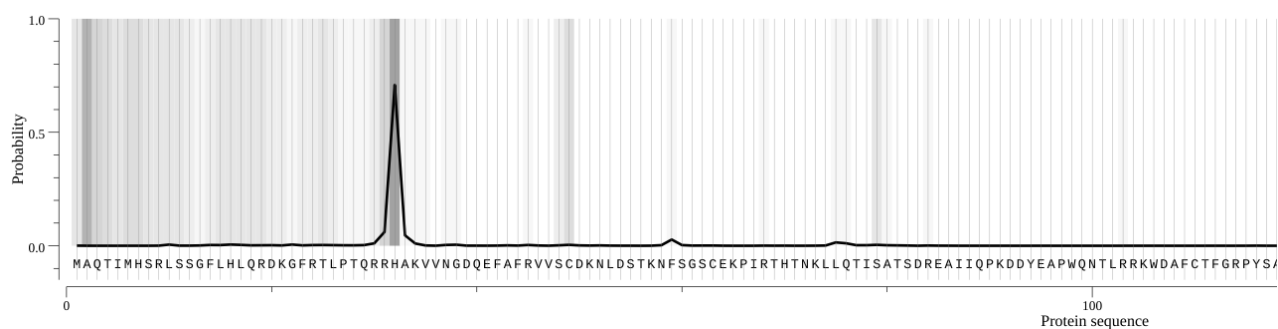

**Figure S12.** TargetP results for PT1 from *Pastinaca sativa*.

**Prediction:** Other

| Protein type | Signal Peptide (Sec/SPI) | Other  |
|--------------|--------------------------|--------|
| Likelihood   | 0.0006                   | 0.9994 |

SignalP-5.0 prediction (Eukarya): Sequence

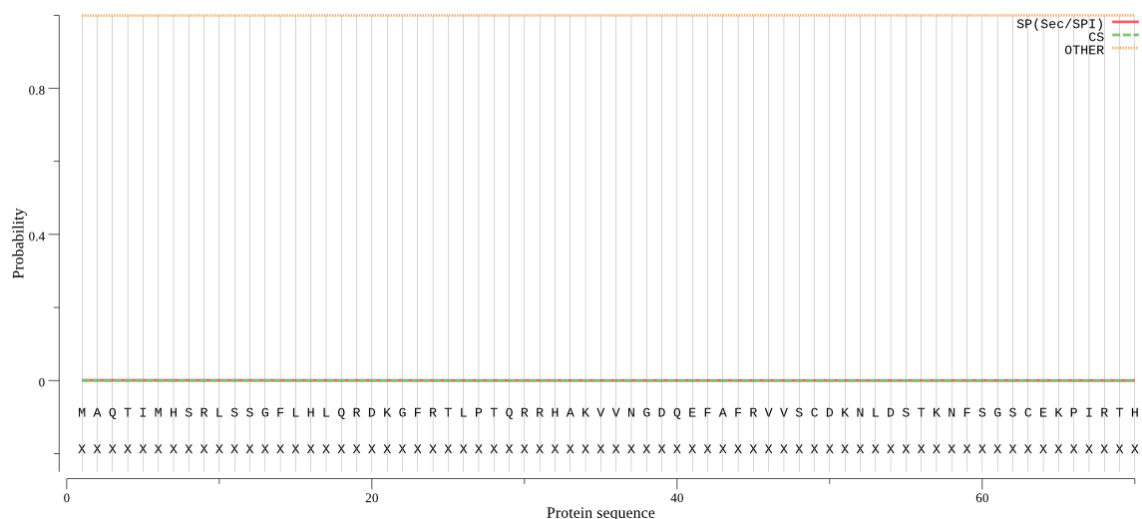

**Figure S13.** SignalP-5.0 results for PT1 from *Pastinaca sativa*.



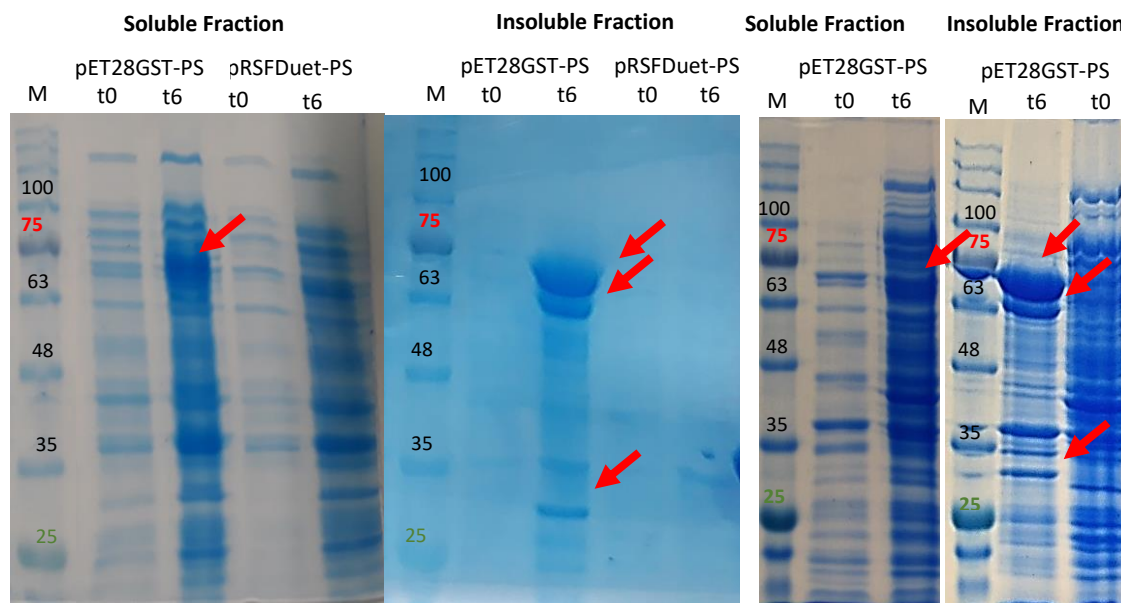

**Figure S14.** Protein SDS gels showing psoralen synthase (PS) expression using different plasmids (pRSFDuet-PS and pET28GST-PS) at time zero (t0) of induction and after 6 h (t6) of induction. PS is expected around 55.9 kDa and GST+PS at 82.08 kDa. Arrows indicate where it is possible to observe the bands of interest. M: marker (NZYColour Protein Marker II – NZYTech).

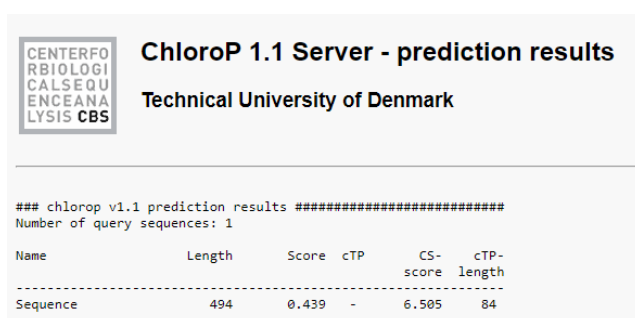

**Figure S15.** ChloroP results for PS from *Ammi majus*.

## iPSORT Prediction

Predicted as: *having a mitochondrial targeting peptide*

Sequence (Type: plant)

```
1 MKMLE QNPQY LYFFS LFLVT IFLYK MLTLK KTPLK NLPPS PPQYP IIGNL
51 HQIGP DPQAS LRDLA QKYGK LMFLK FGTVP VLVVS SADAA REALK THDLV
101 FADRP YSSVA NKIFY NGKDM VFARY TEYHR QVKSI CVTQL LSNKR VNSFH
151 YVREE EVDLL VQNLE NSHSK VANLT ELLIE VTGNV VCRVS VSGSD KVDSE
201 KILIL EIMDM LGYSR SIEDF FPLLG WVDWL TGLRG KVAEA AKGVD TFLEG
251 VLKEH LSTTG SKYND FVSIL LEIQE ADAGS SMDNE CIKSL INDMML GAGTE
301 TISTA LEWTL AALIK NPDAM FKLQN EVREI GKGKS KISEA DLVKM NYLQA
351 VMKES MRLVF TAPLL VPREA RQDIK FMGYD ISSGT QVLIN AWATA RDPLL
401 WDKPE EFRPE RFLNS PIDYK GFHYE FLPGF AGRRG CPGIQ FAMCI NELVV
451 ANLVH KFNFE LPDGK RLEDL DMTAA SGITL RKKSP LLVVA RPHV
```

Values used for reasoning

| Node                              | Answer | View                                               | Substring | Value(s)                                                                      | Plot                 |
|-----------------------------------|--------|----------------------------------------------------|-----------|-------------------------------------------------------------------------------|----------------------|
| 1. Signal peptide?                | No     | Average Hydropathy (KYTJ820101)                    | [6,25]    | 0.685 ( >= 0.9225? No)                                                        | <a href="#">show</a> |
| 2. Mitochondrial or chloroplast ? | Yes    | Average Negative Charge (FAUJ880112)               | [1,30]    | 0.0333333 (< 0.083? Yes)                                                      | <a href="#">show</a> |
|                                   |        | Indexing: AI1<br>Pattern: 22121222 (ins/del <= 2)  | [1,30]    | MKMLEQNPQYLYFFSLFLV-TIFLYKMLTLK<br>202202022222222222-21222022220<br>22121222 | --                   |
| 3. Mitochondrial?                 | Yes    | Average Isoelectric Point (ZIMJ680104)             | [1,15]    | 5.82467 (>= 6.21? No)                                                         | <a href="#">show</a> |
|                                   |        | Indexing: AI2<br>Pattern: 100100110 (ins/del <= 3) | [1,15]    | MKMLEQ--NPQYLYFFS<br>0100-00--020000000<br>100100110                          | --                   |

Figure S16. iPSORT results for PS from *Ammi majus*.

## TMHMM result

```
# PS Length: 494
# PS Number of predicted TMHs: 1
# PS Exp number of AAs in TMHs: 21.929769999999999
# PS Exp number, first 60 AAs: 19.06224
# PS Total prob of N-in: 0.80603
# PS POSSIBLE N-term signal sequence
PS TMHMM2.0 inside 1 11
PS TMHMM2.0 TMhelix 12 29
PS TMHMM2.0 outside 30 494
```

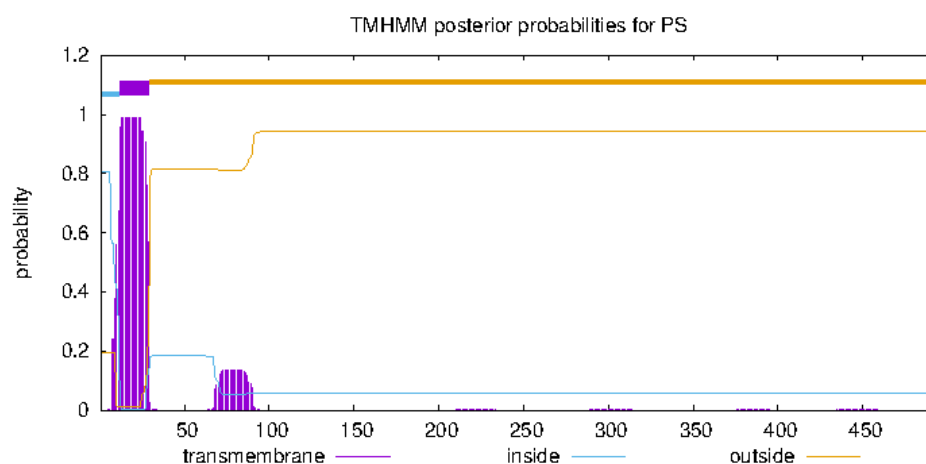

Figure S17. TMHMM-2.0 results for PS from *Ammi majus*.

# LOCtree 3 Protein Subcellular Localization Prediction System

Domain: Eukaryota

| Details | Protein ID | Score | Expected Accuracy | Localization Class    | Gene Ontology Terms                    | Annotation Type |
|---------|------------|-------|-------------------|-----------------------|----------------------------------------|-----------------|
| Details | PS         | 25    | 84%               | endoplasmic reticulum | endoplasmic reticulum GO:0005783(IEA); | PSI-BLAST       |

**Figure S18.** LocTree3 results for PS from *Ammi majus*.

## BaCelLo

Balanced Subcellular Localization Predictor

Home

Prediction

Datasets

Proteomes

Info

### Results

Predictor chosen: **Plants**

| Name of the sequence: | Localization:      | Localization Steps:                         |
|-----------------------|--------------------|---------------------------------------------|
| PS                    | <b>Chloroplast</b> | (Intracellular -> Organelle -> Chloroplast) |

**Figure S19.** BaCelLo results for PS from *Ammi majus*.

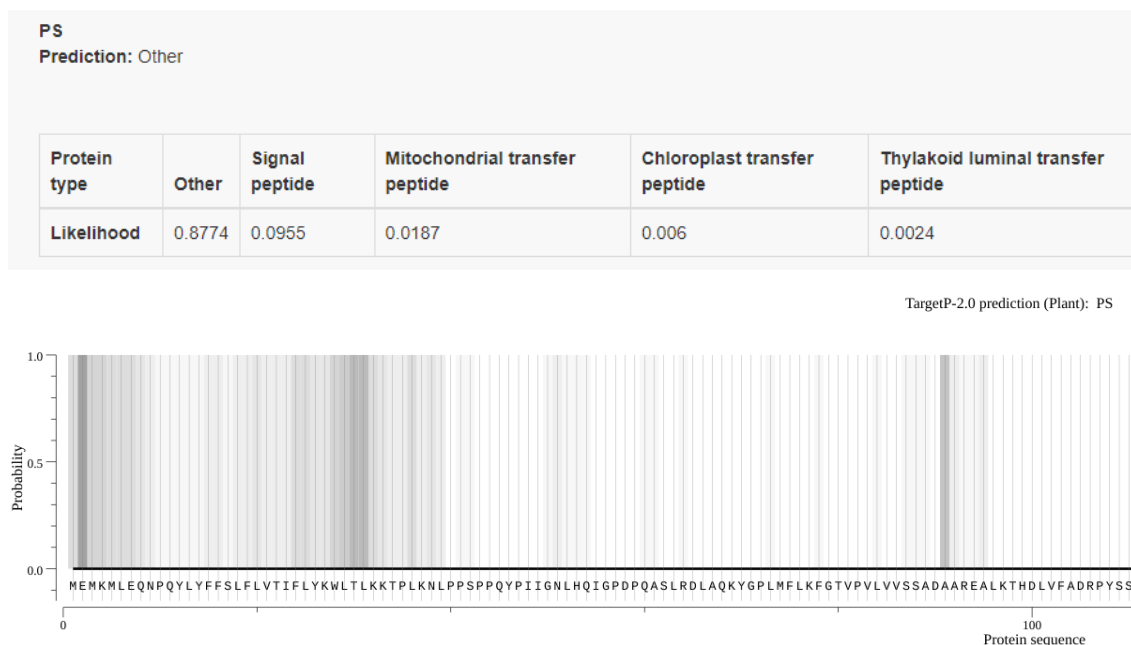

**Figure S20.** TargetP-2.0 results for PS from *Ammi majus*.

Prediction: Other

| Protein type | Signal Peptide (Sec/SPI) | Other |
|--------------|--------------------------|-------|
| Likelihood   | 0.006                    | 0.994 |

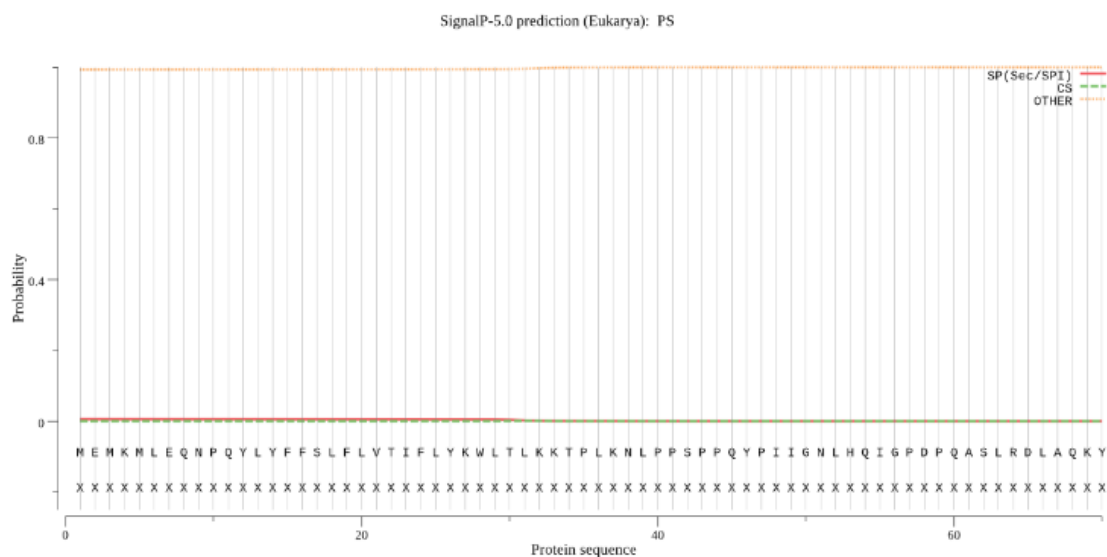

Figure S21. SignalP-5.0 results for PS from *Ammi majus*.

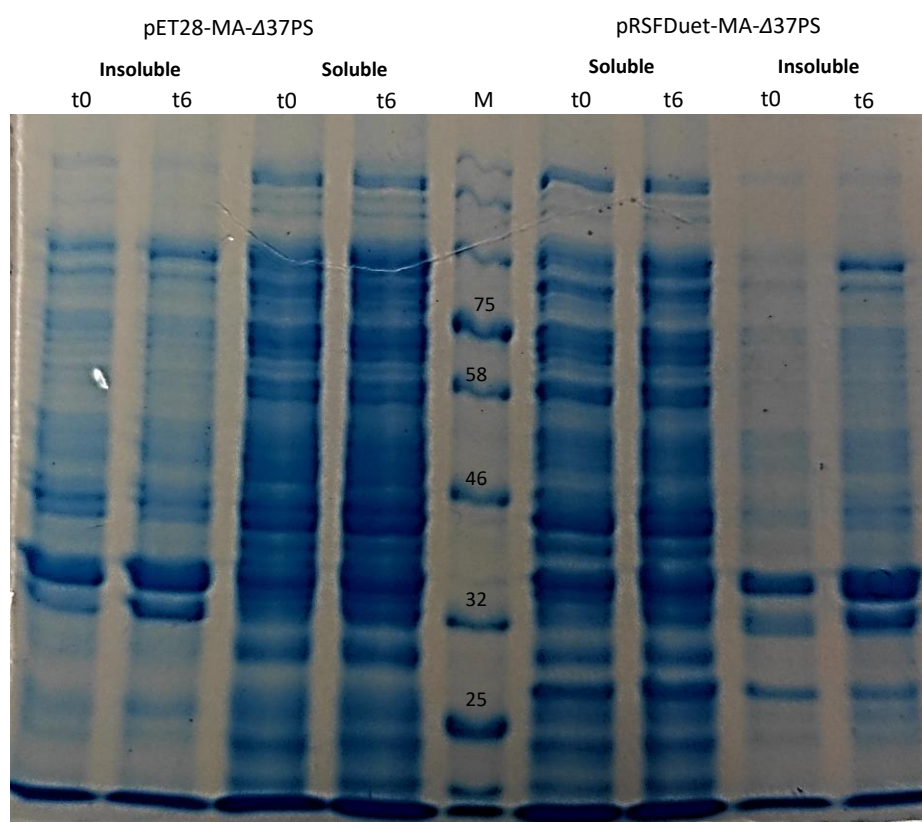

Figure S22. Protein SDS gels showing  $\Delta 37$  aa psoralen synthase (PS) expression with MA N-terminal using different plasmids (pRSFDuet-MA- $\Delta 37$ PS and pET28-MA- $\Delta 37$ PS) at time zero (t0) of induction and after 6 h (t6) of induction. PS is expected around 52–54 kDa. M: marker (Blue Prestained Protein Standard, Broad Range - NEB).

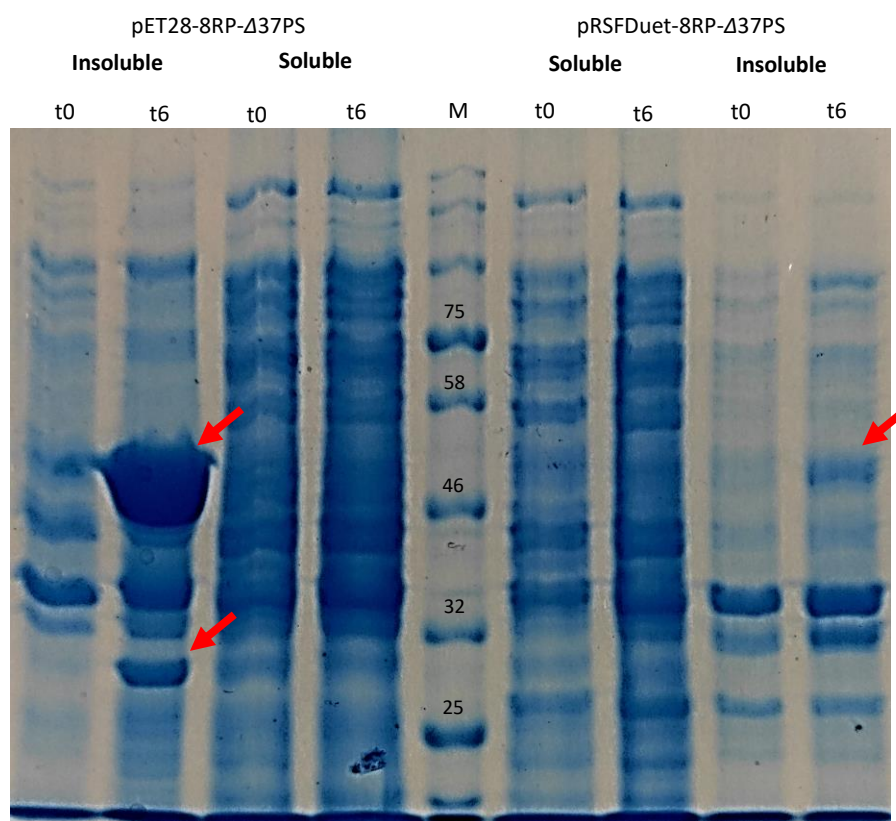

**Figure S23.** Protein SDS gels showing  $\Delta 37$  aa psoralen synthase (PS) expression with 8RP N-terminal using different plasmids (pRSFDuet-8RP- $\Delta 37$ PS and pET28-8RP- $\Delta 37$ PS) at time zero (t0) of induction and after 6 h (t6) of induction. PS is expected around 53-55 kDa. Arrows indicate where it is possible to observe the bands of interest. M: marker (Blue Prestained Protein Standard, Broad Range - NEB).

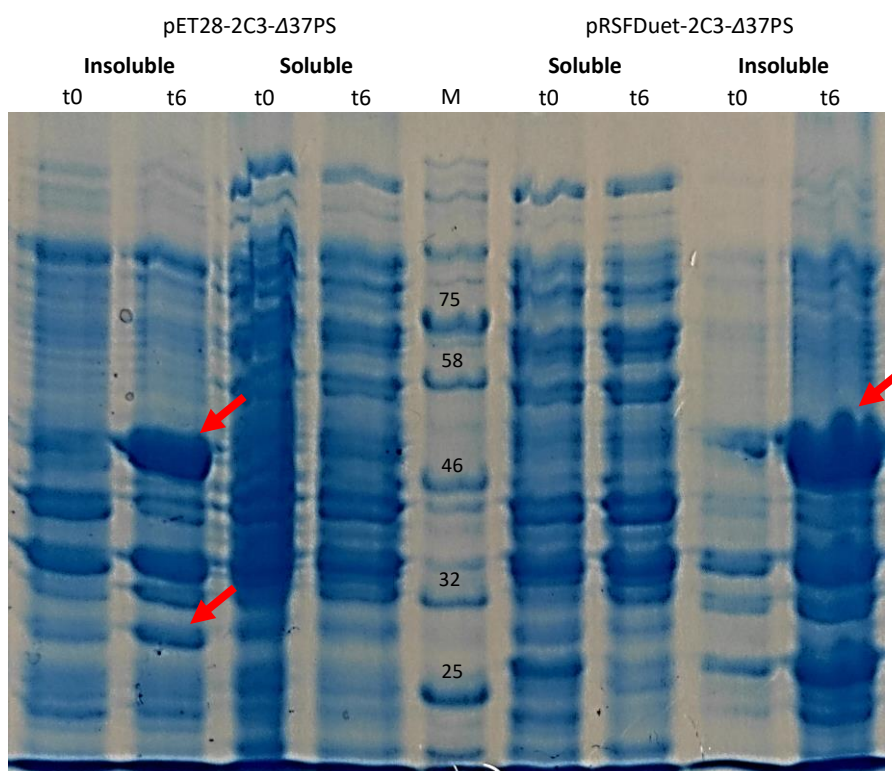

**Figure S24.** Protein SDS gels showing  $\Delta 37$  aa psoralen synthase (PS) expression with 2C3 N-terminal using different plasmids (pRSFDuet-2C3- $\Delta 37$ PS and pET28-2C3- $\Delta 37$ PS) at time zero (t0) of induction and after 6 h (t6) of induction. PS is expected around 53-55 kDa. Arrows indicate where it is possible to observe the bands of interest. M: marker (Blue Prestained Protein Standard, Broad Range - NEB).



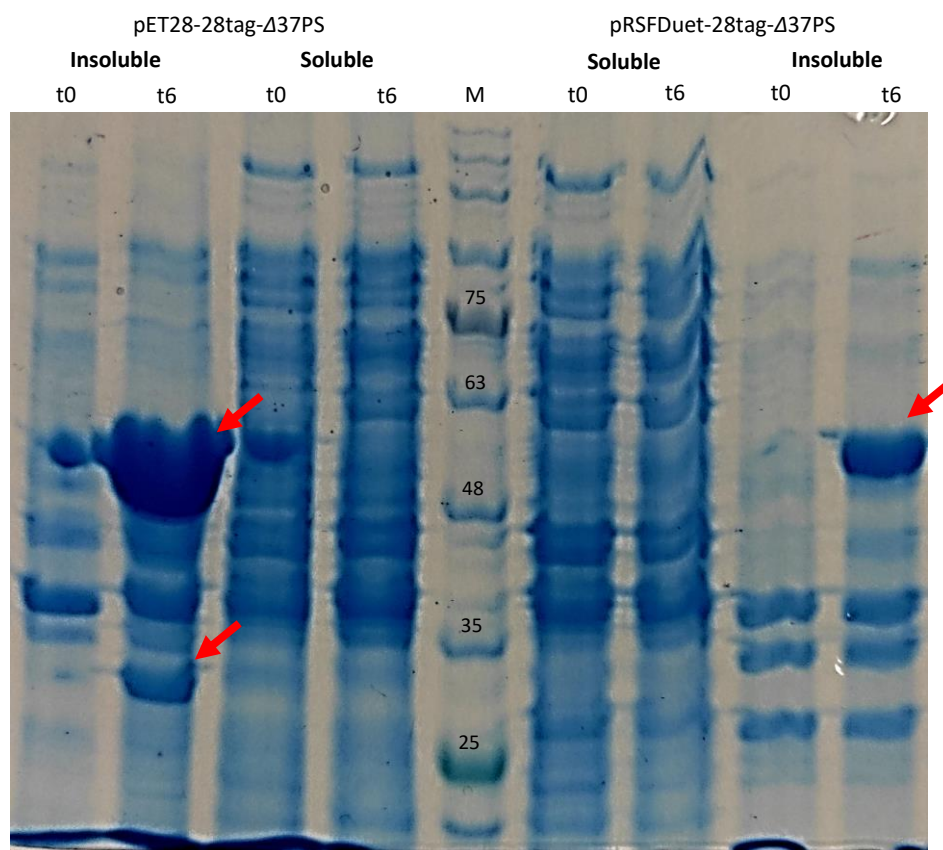

**Figure S25.** Protein SDS gels showing  $\Delta 37$  aa psoralen synthase (PS) expression with 28tag N-terminal using different plasmids (pRSFDuet-28tag- $\Delta 37$ PS and pET28-28tag- $\Delta 37$ PS) at time zero (t0) of induction and after 6 h (t6) of induction. PS is expected around 55-57 kDa. Arrows indicate where it is possible to observe the bands of interest. M: marker (NZYColour Protein Marker II – NZYTech).

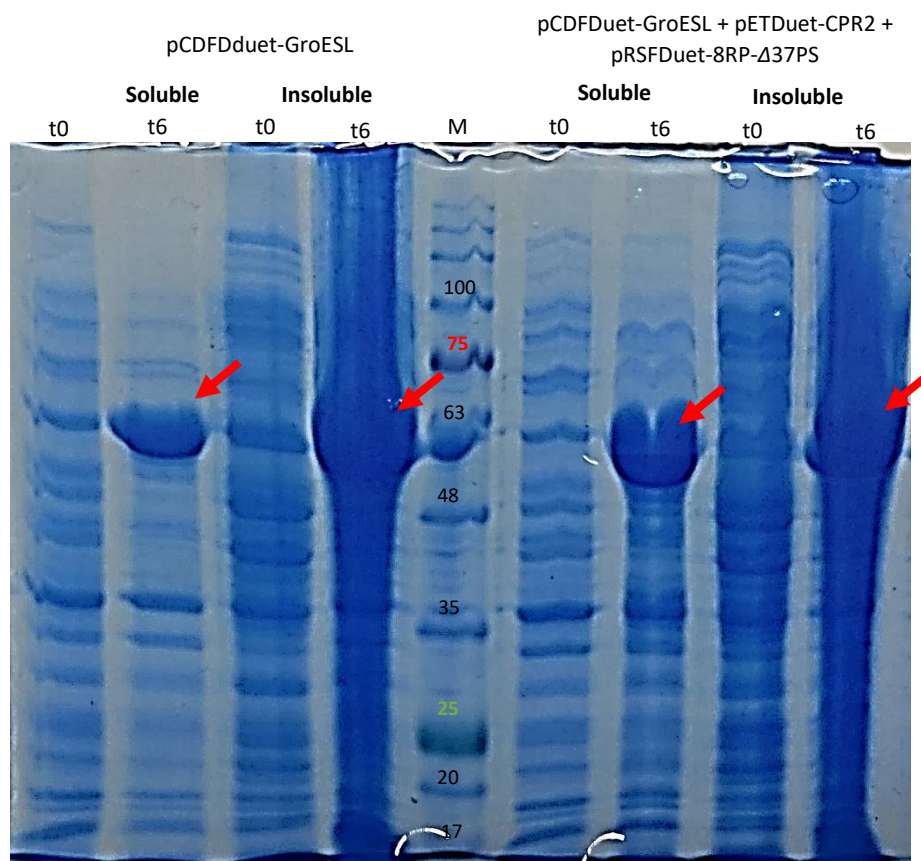

**Figure S26.** Protein SDS gels showing GroESL expression alone and when combined with cytochrome P450 reductase (CPR2) and 8RP- $\Delta$ 37PS at time zero (t0) of induction and after 6 h (t6) of induction. GroEL, GroES, CPR2 and 8RP- $\Delta$ 37PS are expected at round 57, 10, 79 and 55 kDa, respectively. Arrows indicate where it is possible to observe the bands of interest. M: marker (NZYColour Protein Marker II – NZYTech).



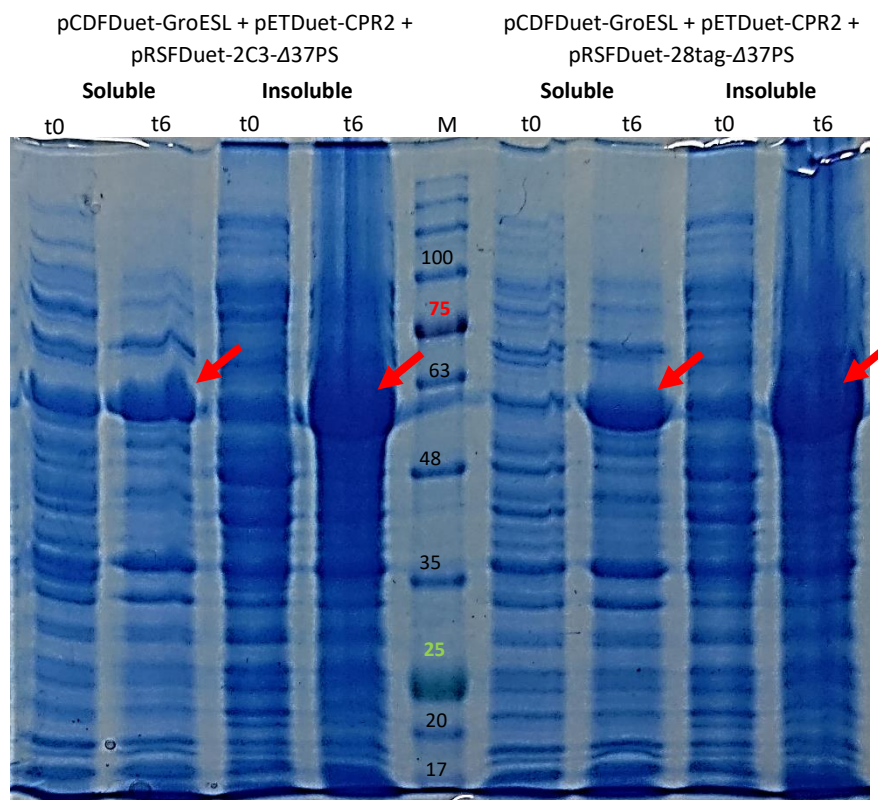

**Figure S27.** Protein SDS gels showing GroESL expression combined with cytochrome P450 reductase (CPR2) and 2C3-Δ37PS or 28tag-Δ37PS at time zero (t0) of induction and after 6 h (t6) of induction. GroEL, GroES, CPR2, 2C3-Δ37PS and 28tag-Δ37PS are expected at round 57, 10, 79, 55 and 56 kDa, respectively. Arrows indicate where it is possible to observe the bands of interest. M: marker (NZYColour Protein Marker II – NZYTech).

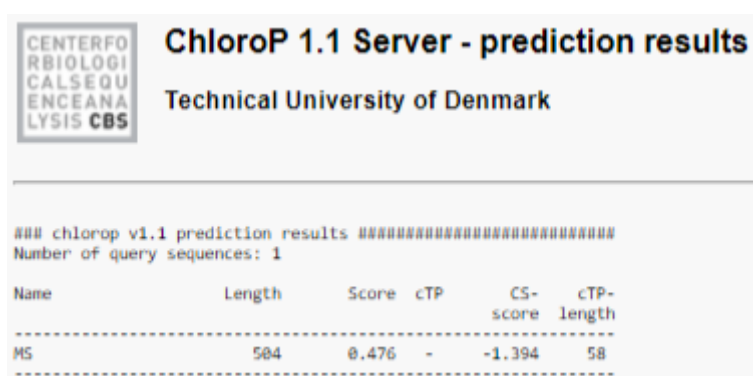

**Figure S28.** ChloroP results for MS from *Ficus carica*.

LOCTREE 3  
Protein Subcellular Localization Prediction System

Domain: Eukaryota

| Details | Protein ID | Score | Expected Accuracy | Localization Class             | Gene Ontology Terms                                                                   | Annotation Type |
|---------|------------|-------|-------------------|--------------------------------|---------------------------------------------------------------------------------------|-----------------|
| Details | MS         | 42    | 89%               | endoplasmic reticulum membrane | endoplasmic reticulum membrane GO:0005789(IEA); integral to membrane GO:0016021(IEA); | PSI-BLAST       |

**Figure S29.** LocTree3 results for MS from *Ficus carica*.

Home

Prediction

Datasets

Proteomes

Info

# BaCellLo

## Balanced Subcellular Localization Predictor

## Results

Predictor chosen: **Plants**

| Name of the sequence: | Localization:    | Localization Steps: |
|-----------------------|------------------|---------------------|
| MS                    | <b>Secretory</b> | (Secretory)         |

**Figure S30.** BaCelLo results for MS from *Ficus carica*.

## iPSORT Prediction

**Predicted as: having a signal peptide**

Sequence (Type: plant)

|     |       |       |       |       |       |       |       |       |       |       |
|-----|-------|-------|-------|-------|-------|-------|-------|-------|-------|-------|
| 1   | MSMDI | FTSL  | YLALI | LFSL  | QVFRS | FAPPK | HKRLP | PGPKP | RPIIG | SLLLE |
| 51  | GDQPH | RSLAR | LSESY | GPFMH | LKLQG | VTTVV | ISSTT | MAKEV | LQANS | QVSS  |
| 101 | RTITD | ASRAH | RHSDF | SNMVL | PVSP  | WRNLR | KISNS | HLSS  | KALDG | NMELR |
| 151 | NKKVK | ELLND | VKHSV | QAGEA | VEIAS | LSFRA | TLNLL | STTF  | SMDMA | DDTNS |
| 201 | VTLKE | LGKHE | SHMME | ELKAP | NLADY | FPFLQ | KIDQP | GIRRR | NTVTF | RKLIN |
| 251 | LFGR  | IDQRL | KVREA | SGSLK | DDDLT | DTLIN | MMVVD | QEKKE | QDLQK | TIIEH |
| 301 | FLDL  | FSAGT | ETTST | TLEWA | MAELV | KAPEI | MSKAR | AELDQ | VIGKG | NQVKE |
| 351 | SDVSR | LPVLQ | AIVKE | TFRIH | PTAPL | LIPRK | ADSDI | EISDY | IIPDK | AQVTV |
| 401 | NWNAI | GRDSS | TWENP | DKFIP | ERFLD | IDIDV | GGRFD | KLIPF | GAGRR | ICPGF |
| 451 | PLAMR | HLMML | LGSL  | HSFWD | KLEDG | VRPDA | NWIDE | KFGLT | LQMAQ | PLRAI |
| 501 | PVPTK | H     |       |       |       |       |       |       |       |       |

| Values used for reasoning         |        |                                                    |           |                                                                          |                      |
|-----------------------------------|--------|----------------------------------------------------|-----------|--------------------------------------------------------------------------|----------------------|
| Node                              | Answer | View                                               | Substring | Value(s)                                                                 | Plot                 |
| 1. Signal peptide?                | Yes    | Average Hydropathy (KYTJ820101)                    | [6,25]    | 1.605 ( >= 0.9225? Yes)                                                  | <a href="#">show</a> |
| 2. Mitochondrial or chloroplast ? | No     | Average Negative Charge (FAUJ80112)                | [1,30]    | 0.0333333 ( < 0.083? Yes)                                                | <a href="#">show</a> |
|                                   |        | Indexing: AI1<br>Pattern: 22121222 (ins/del <= 2)  | [1,30]    | HWDIPTSLLYLA-LILFFLQVFRSFAFK<br>222012222222-212222222122220<br>22121222 | --                   |
| 3. Mitochondrial?                 | No     | Average Isoelectric Point (ZIMJ680104)             | [1,15]    | 5.62467 ( >= 6.21? No)                                                   | <a href="#">show</a> |
|                                   |        | Indexing: AI2<br>Pattern: 100100110 (ins/del <= 3) | [1,15]    | HWDIPTSLLYLAL<br>000020000000002<br>NOMATCH                              | --                   |

**Figure S31.** iPSORT results for MS from *Ficus carica*.

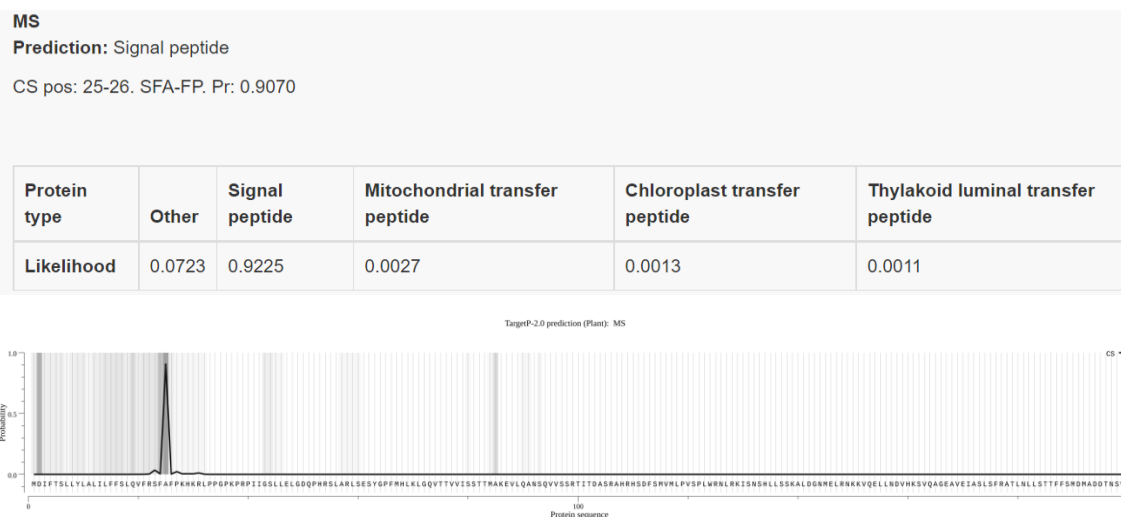

**Figure S32.** TargetP-2.0 results for MS from *Ficus carica*.

**Prediction:** Signal peptide (Sec/SPI)  
 Cleavage site between pos. 25 and 26: SFA-FP. Probability: 0.535'

| Protein type      | Signal Peptide (Sec/SPI) | Other  |
|-------------------|--------------------------|--------|
| <b>Likelihood</b> | 0.6097                   | 0.3903 |

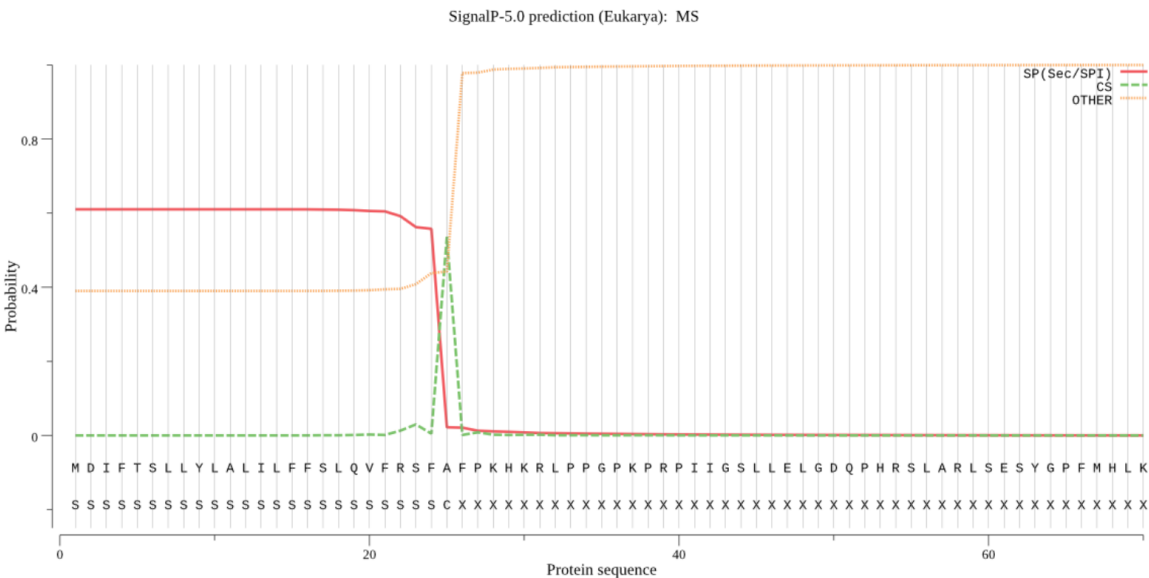

**Figure S33.** SignalP-5.0 results for MS from *Ficus carica*.

## TMHMM result

```
# MS Length: 504
# MS Number of predicted TMHs: 1
# MS Exp number of AAs in TMHs: 19.092809999999999
# MS Exp number, first 60 AAs: 19.04846
# MS Total prob of N-in: 0.95858
# MS POSSIBLE N-term signal sequence
MS   TMHMM2.0   inside    1    6
MS   TMHMM2.0   TMhelix   7   26
MS   TMHMM2.0   outside   27  504
```

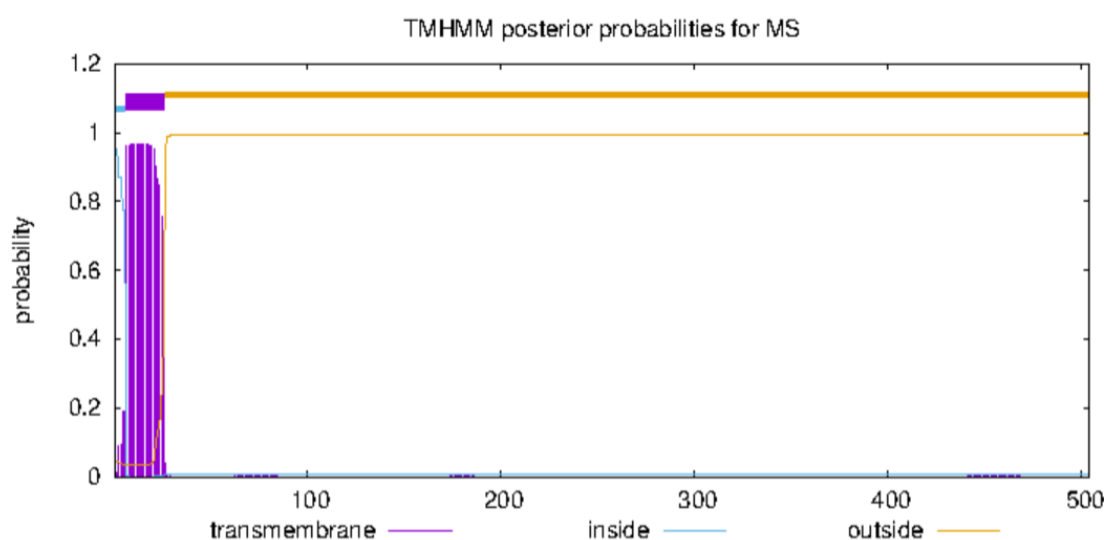

Figure S34. TMHMM-2.0 results for MS from *Ficus carica*.
